# Supplementary material
Source: publisher site journal article supplement (https://www.dovepress.com/get_supplementary_file.php?f=478826.docx)
Supplement: Supplementary file 1 [file get_supplementary_file.php]

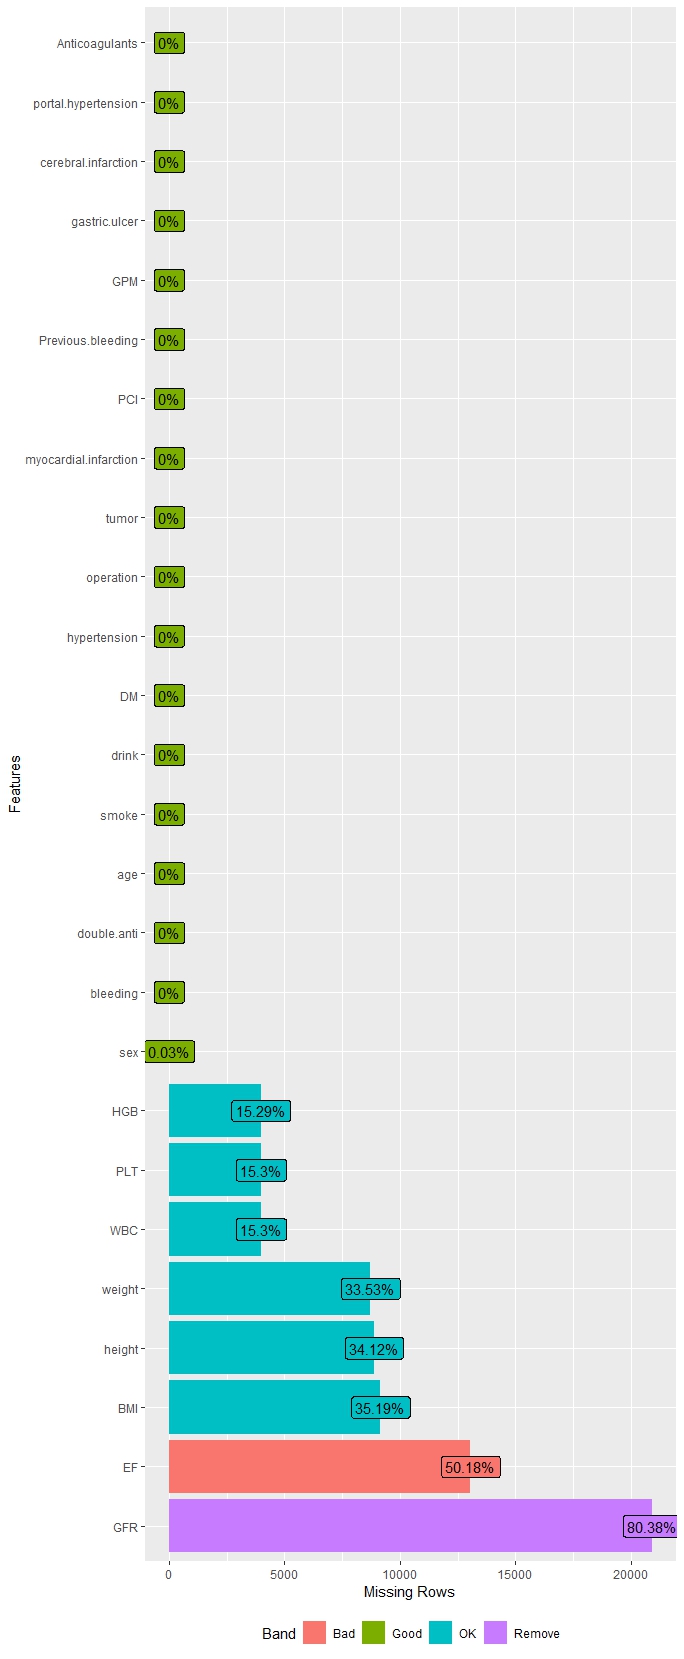


Appendix 1 Variables with missing information

Notes: GPM, Gastric protective medicine; PCI, Percutaneous Coronary Intervention; DM, Diabetes Mellitus; Double anti, dual antiplatelet therapy; HGB, hemoglobin; PLT, platelet count. WBC, White blood cell count; BMI, Body Mass Index; GFR, glomerular filtration rate; EF, cardiac ejection fraction.
